1 Quantitative Analysis of Effects of a Single  $^{60}\text{Co}$  Gamma Ray  
2 Point Exposure on Time-Dependent Change in Locomotor  
3 Activity in Rats

4 Keiko Otani<sup>1\*</sup>, Megu Ohtaki<sup>1¶</sup>, Nariaki Fujimoto<sup>2¶</sup>, Aisulu Saimova<sup>3&</sup>, Ynkar Kairkhanova<sup>4&</sup>, Darkhan  
5 Uzbekov<sup>5&</sup>, Nailya Chaizhunusova<sup>6&</sup>, Nulran Aukenov<sup>7&</sup>, Tolebay Rakhypbekov<sup>8&</sup>, Hitoshi Sato<sup>9&</sup>,  
6 Noriyuki Kawano<sup>1&</sup>, Masaharu Hoshi<sup>1¶</sup>

7

8 <sup>1</sup> The Center for Peace, Hiroshima University, Hiroshima, Japan

9 <sup>2</sup>Research Institute for Radiation Biology and Medicine, Hiroshima University, Hiroshima,  
10 Japan

11 <sup>3</sup>Maxillo-facial and facial plastic surgery, Semey Medical University, Semey, Kazakhstan

12 <sup>4</sup>Microbiology, Semey Medical University, Semey, Kazakhstan

13 <sup>5</sup>Pathological anatomy and forensic medicine, Semey Medical University, Semey, Kazakhstan

14 <sup>6</sup>Public health, Medical University, Semey, Kazakhstan

15 <sup>7</sup>Science and human resources, The Ministry of Healthcare, Semey, Kazakhstan

16 <sup>8</sup>Board of Directors, Astana Medical University, Astana, Kazakhstan

17 <sup>9</sup>Radiological Sciences, Ibaraki Prefectural University of Health Sciences, Ibaraki, Japan.

18

19 \*Corresponding author

20 Email: [ohitani@hiroshima-u.ac.jp](mailto:ohitani@hiroshima-u.ac.jp) (KO)

21 <sup>†</sup>These authors contributed equally to this work.

22 <sup>&</sup>These authors also contributed equally to this work.

23

## 24 **Abstract**

25 Fatigue is one of the earliest nonspecific symptoms of radiation exposure in humans,  
26 but its etiology, mechanism, and dose dependency remain unexplained. Investigating initial  
27 behavioral changes caused by irradiation of animals might provide important information to  
28 aid understanding of early health effects of radiation exposure and clinical features of  
29 radiation injury. Although previous studies in rodents suggested that radiation exposure  
30 leads to reduced activity, detailed properties of the effects were unrevealed due to a lack of  
31 proper statistical analysis, which is needed to better elucidate details of changes in  
32 locomotor activity. Ten-week-old male Wistar rats were subjected to single point external  
33 whole-body irradiation with <sup>60</sup>Co gamma rays at 0, 2.0, 3.5, and 5.0 Gy (4 rats per group).

34 Infrared sensors were used to continuously record locomotor activity of each rat. Cumulative  
35 number of movements during the night was defined as “activity” for each day. A non-linear  
36 mixed effects model accounting for individual differences and daily fluctuation of activity was  
37 applied to analyze the rats’ longitudinal locomotor data. Despite a small number of animals  
38 per group, our statistical method successfully revealed characteristics of the changes in  
39 locomotor activity after radiation exposure, showing that 1) reduction in activity occurred  
40 immediately—and in a dose-dependent manner—after irradiation and 2) recovery to  
41 pre-irradiation levels required almost one week, with the same recovery rate in each dose  
42 group. In addition to improving our understanding of radiation effects on locomotor activity,  
43 this statistical framework should be useful to analyze other data with similar structure.

44

## 45 **1. Introduction**

46 In humans, one of the earliest effects of radiation exposure to the whole body or to a large  
47 portion of the whole body is a prodromal period of nonspecific signs and symptoms such as nausea,  
48 emesis, fatigue, fever, and anorexia [1–2]. The prodromal syndrome is generally mild or absent at  
49 total body doses of 1 Gy or less and occurs from minutes to days following exposure [3–5]. However,  
50 it is unclear to what extent these symptoms are psychogenic versus radiation-induced. Therefore,  
51 the relationship between initial symptoms and radiation dose is not well understood.

52           Early effects of irradiation have been studied in regard to radiation therapy. In a detailed  
53 study of the incidence and severity of side effects during the course of radiation therapy, fatigue was  
54 the most prevalent and the most severe symptom reported by patients [6]. With fractionated doses of  
55 radiation for cancer treatment, radiation-induced fatigue sets in within a few days after start of  
56 treatment and decreases after treatment completion [7]. Although the underlying mechanisms of  
57 fatigue have been studied under several disease conditions, an understanding of the etiology,  
58 mechanisms, and risk factors of radiation-induced fatigue remains elusive, and this symptom  
59 remains poorly managed [8-10]. Investigating initial radiation-related behavioral changes by using  
60 animals might provide important information to aid understanding of the health effects of radiation  
61 exposure and clinical features of radiation injury.

62           In animals, there have been many studies of radiation-induced behavioral effects, and  
63 performance decrement after irradiation has been noted in several reports. A sub-lethal dose of  
64 gamma radiation suppressed aggressive behavior in male mice [11], a lethal dose of gamma  
65 radiation suppressed locomotor activity in mice [12], and a sub-lethal dose of X-irradiation  
66 suppressed volitional activity in rats [13]. Landauer (2002) provided a review of expected  
67 performance decrement after radiation exposure [14]. These reports showed that ionizing radiation  
68 temporarily suppresses animals' behavior, but that the effect does not continue for a long period.  
69 York et al. reported that, 6 h after gamma irradiation with 50 or 200 cGy, spontaneous locomotor

70 activity in mice was 35% or 36% lower, respectively, than in sham irradiated controls, and that their  
71 activity recovered to sham irradiated level 12 h after irradiation [15].

72 Although many animal behavioral experiments have a time-dependent data structure with  
73 variation among individuals, analyses have typically been performed only at individual time points  
74 with no parameterization of the trend in activity over time. Therefore, quantitative analyses have not  
75 been made directly on the chronological features. To obtain more detailed and accurate information  
76 from data obtained in animal behavior experiments with time-dependent structure and individual  
77 variability, application of statistical theory would suggest that analysis based on a mixed effects  
78 model [16–17] is both appropriate and effective.

79 The purpose of the present study was therefore to examine in detail the changes over time in  
80 locomotor activity of rats immediately after external irradiation with  $^{60}\text{Co}$  gamma rays by using such  
81 statistical models. Specifically, we aimed to assess the time when reduction of locomotor activity  
82 begins, the time when locomotor activity recovers to pre-irradiation level, the dose dependency of the  
83 degree of reduction in locomotor activity, and the dose dependency of the rate of recovery. There are  
84 individual differences in animal behavior that cannot be ignored, even if the animal type, gender, and  
85 weight are uniform. In addition, when animals are observed over a long period of time, it is expected  
86 that common changes in behavior will occur due to indoor conditions such as temperature, humidity,  
87 and noise, which can change daily, and it is necessary to adjust for these sources of variation.

## 88 **2. Materials and Methods**

### 89 **2.1. Experimental Design and Data Collection**

90 **2.1.1. Animals.** The experiment was approved by the Animal Experiment Committee of  
91 Semey Medical University, Republic of Kazakhstan, and was conducted in accordance with the  
92 Institutional Guide for Animal Care and Use. Ten one-week-old male Wistar rats were purchased  
93 from the Kazakh Scientific Center of Quarantine and Zoonotic Diseases, Almaty, Kazakhstan and  
94 allowed free access to a basal diet and tap water. Animal rooms were maintained at 19-22 °C with  
95 relative humidity 30–70% and a 12 h light cycle. Body weights were measured twice a week during  
96 the experiment. At 11 weeks of age, the rats were randomly divided into four groups: control (4 rats)  
97 and three irradiated groups (4 rats/group). Each irradiated group received 2, 3.5, or 5.0 Gy of whole  
98 body gamma irradiation. Controls were handled with all conditions the same as with the other groups,  
99 except that they were not irradiated (dose 0 Gy). The LD<sub>50(30)</sub> for this strain of Wistar rats is 7 Gy with  
100 cobalt-60 radiation [18].

101 **2.1.2. Irradiation with <sup>60</sup>Co gamma-rays** Irradiation was performed with a Teragam K-2  
102 unit (UJP Praha, Praha-Zbraslav, Czech Republic) at the Regional Oncology Dispensary of Semey.  
103 Rats were irradiated at 1 m distance from the <sup>60</sup>Co source at a dose rate of 2.6 Gy/min. Half of the  
104 radiation dose was administered from the top and the other half was administered from the bottom. A

105 radiophotoluminescence glass dosimeter, GD-302M [Chiyoda Technol Co., Tokyo, Japan], was used  
106 for measuring the doses.

107 **2.1.3. Measurements of daily locomotor activity** Locomotor activities (hereafter  
108 abbreviated as “activities”) of the rats were measured with infra-red sensors (Model NS-AS01;  
109 Neuroscience, Inc., Tokyo, Japan) placed 16 cm above the open-top cages (26.5 x 43 x 14.5 cm).  
110 Numbers of movements were counted on the basis of change in the strength of infra-red rays emitted  
111 from the animals. The rats were placed in separate cages, each outfitted with a sensor, and  
112 movements were continuously counted by a computerized analysis system (16 channel Multi-digital  
113 Counter System [MDC] and DAS System software, Neuroscience, Inc. Tokyo, Japan).  
114 Measurements were started 3 days before irradiation and continued for 20 days after irradiation.

115 **2.1.4. Ethical approval** All applicable international, national, and/or institutional guidelines for  
116 the care and use of animals were followed. The animal experiment was approved by the Animal  
117 Experiment Committee of Semey Medical University, Republic of Kazakhstan (Protocol No 5 dated  
118 16.04.2014), and conducted in accordance with the Institutional Guide for Animal Care and Use.

## 119 **2.2. Statistical analyses**

120 **2.2.1. Definition of daily activity** Because rats are nocturnal animals [19], cumulative  
121 number of movements was recorded during the period between 18:00 and 06:00; the number of

122 movements so recorded was defined as activity of a rat in one day. As shown in Fig 1, rates of  
123 increase in cumulative movements (slopes) were steeper during nighttime (18:00–05:59) than  
124 during daytime (06:00–17:59); i.e., the rats were more active at night, as expected.

125

126 **Fig 1. Cumulative number of movements of each of the 16 rats over a 36-hour period.**

127

128 This suggests that the activity defined in this study represents the nocturnal characteristic of rats and  
129 it shows that the measure has relevance as an indicator of a rat's activity.

130 **2.2.2. Data modeling** Logarithmic values of daily activity of each rat as a function of elapsed

131 time relative to day of irradiation are shown for each group in Fig 2.

132

133 **Fig 2. Daily activity of each of four rats belonging to four groups.** The vertical axis shows

134 logarithm of daily activity (number of nocturnal movements) and the horizontal axis shows elapsed

135 time in days relative to the day of irradiation (indicated by arrows): (a) the control group, (b) 2.0 Gy

136 group, (c) 3.5 Gy group, and (d) 5.0 Gy group.

137

138 An acute decrease in activity after irradiation followed by quick recovery to the pre-irradiation level can

139 be seen in every exposed group, whereas no such change or trend was observed in the control



140 group. There also was large inter-animal variation with daily fluctuation in activity. Therefore we  
 141 assumed a non-linear mixed effects model [16–17] that takes into account the dose dependency of  
 142 the decrease in activity, the dose dependency of the recovery rate, individual differences among  
 143 animals, and daily fluctuations within individual animals. For comparison, we fit a simple non-linear  
 144 regression model in which individual differences and daily fluctuations were not taken into account.

145 **2.2.3. Non-linear mixed effects model (NLMM)** Let  $y_{it}$  be the log transformed  
 146 observed activity of rat  $i$  at time  $t$  in days since irradiation with dose  $D_i$  ( $t = -3, \dots, 20$ ;  $i = 1, \dots, 16$ ),  
 147 where " $t = 0$ " indicates day of irradiation. We assume the model

$$148 \quad y_{it} = f(t | D_i, \theta) + \delta_i + \eta_t + \varepsilon_{it},$$

$$149 \quad f(t | D_i, \theta) = \xi_0 + \xi_1 t + \xi_2 t^2 - (\beta_1 D_i + \beta_2 D_i^2) \cdot \exp\left[\left\{-\omega_1 \cdot e^{-\omega_2(D_i - D_0)}\right\} t\right] \cdot h(t),$$

$$150 \quad \delta_i \square N(0, \psi^2), \quad \eta_t \square N(0, \varphi^2), \quad \varepsilon_{it} \square N(0, \sigma^2), \quad t = -3, -2, \dots, 20, \quad i = 1, \dots, 16, \quad (1),$$

151 where  $\theta = (\xi_0, \xi_1, \xi_2, \beta_1, \beta_2, \omega_1, \omega_2)$  denotes unknown parameters for fixed effects to be  
 152 estimated. The term  $\xi_0 + \xi_1 t + \xi_2 t^2$  expresses the time dependency of activities without radiation  
 153 exposure. The term  $\beta_1 D_i + \beta_2 D_i^2$  expresses whether the dose effect in the initial decrease is linear  
 154 ( $\beta_2 = 0$ ) or quadratic ( $\beta_2 \neq 0$ ), and the term  $-\omega_1 \cdot e^{-\omega_2(D_i - D_0)}$  denotes whether the recovery rate  
 155 depends on dose ( $\omega_2 \neq 0$ ) or not ( $\omega_2 = 0$ ).  $D_0$  denotes a fixed pre-assigned dose value for  
 156 covariate centering (in this study 2.75 Gy is adopted),  $\Delta = (\psi^2, \varphi^2, \sigma^2)$  are unknown dispersion  
 157 parameters to be estimated, and the terms  $\delta_i$ ,  $\eta_t$  and  $\varepsilon_{it}$  represent independent random effects

158 due to individual variability, daily fluctuation, and measurement error, respectively. The function

159  $h(t) : h(t) = 0 (t < 0), h(t) = 1 (t \geq 0)$  denotes the Heaviside function of  $t$  to indicate pre- and

160 post-irradiation dichotomy.

161 Let  $\mathbf{y} = (\mathbf{y}_1', \dots, \mathbf{y}_{16}')'$ ,  $\mathbf{y}_i = (y_{i,-3}, \dots, y_{i,20})'$ ,  $i = 1, \dots, 16$ . It follows from Model (1) that  $\mathbf{y}$

162 has a multivariate normal distribution with mean  $\boldsymbol{\mu}(\boldsymbol{\theta}) = (\boldsymbol{\mu}_1(\boldsymbol{\theta})', \dots, \boldsymbol{\mu}_{16}(\boldsymbol{\theta})')'$ ,  $\boldsymbol{\mu}_i(\boldsymbol{\theta}) = f(\mathbf{t} | D_i, \theta)$ ,

163  $\mathbf{t} = (-3, -2, \dots, 20)'$ ,  $i = 1, \dots, 16$ , and variance-covariance matrix

164  $\boldsymbol{\Omega}(\boldsymbol{\Delta}) = I_{16} \otimes (\rho^2 J_{41} + \sigma^2 I_{41}) + J_{16} \otimes \psi^2 I_{41}$ , where  $I_m$  denotes an  $m$ -dimensional unit matrix, and

165  $J_m = \mathbf{1}_m \otimes \mathbf{1}_m'$ . Then the likelihood function of  $(\boldsymbol{\theta}, \boldsymbol{\Delta})$  can be expressed as

166  $L(\boldsymbol{\theta}, \boldsymbol{\Delta}) = \frac{1}{(2\pi)^8 \sqrt{|\boldsymbol{\Omega}(\boldsymbol{\Delta})|}} \exp\left(-\frac{1}{2} \{\mathbf{y} - \boldsymbol{\mu}(\boldsymbol{\theta})\}' \boldsymbol{\Omega}(\boldsymbol{\Delta})^{-1} \{\mathbf{y} - \boldsymbol{\mu}(\boldsymbol{\theta})\}\right)$ . Therefore, the maximum likelihood

167 estimates of  $(\boldsymbol{\theta}, \boldsymbol{\Delta})$ , denoted by  $(\hat{\boldsymbol{\theta}}, \hat{\boldsymbol{\Delta}})$ , are obtained by minimizing the quantity

168  $Q(\boldsymbol{\theta}, \boldsymbol{\Delta}) = \log(|\boldsymbol{\Omega}(\boldsymbol{\Delta})|) + \{\mathbf{y} - \boldsymbol{\mu}(\boldsymbol{\theta})\}' \boldsymbol{\Omega}(\boldsymbol{\Delta})^{-1} \{\mathbf{y} - \boldsymbol{\mu}(\boldsymbol{\theta})\} + 16 \times \log(2\pi)$ . When  $\psi^2 = \varphi^2 = 0$ , Model (1)

169 reduces to an ordinary non-linear regression model (NLRM).

170 **2.2.4. Algorithm and software for implementation of data analyses** The

171 unknown parameters were estimated by using an algorithm for optimization with the

172 limited-memory version of the Broyden–Fletcher–Goldfarb–Shanno method [20] to maximize the

173 likelihood derived from the model (1), and the AIC (Akaike Information Criterion) [21] and BIC

174 (Bayesian information criterion) [22–23] were calculated. The function ‘optim’ in the R software ver.  
175 3.5.1 was used for carrying out numerical analyses.

176 Maximum likelihood (ML) or restricted maximum likelihood (REML) [24] estimates of the  
177 parameters in the linear mixed-effects models can be computed with the “lmer” function in the  
178 “lme4” package for R [25]. In this study, the ML method was used to compare the goodness-of-fit  
179 of models with the AIC criterion. Estimation results were almost the same with both methods.

## 180 **3. Results**

### 181 **3.1. Result of Regression Analysis**

182 **3.1.1. Estimation of fixed effect parameters.** Regression analysis was first  
183 performed with all parameters of the NLMM (full NLMM), then model selection was applied by  
184 choosing the smallest AIC to determine the optimal NLMM (optimal NLMM). The full NLRM and  
185 optimal NLRM were defined in the same way. Estimates of fixed-effect parameters and their 95%  
186 confidence intervals under the full and optimal NLMM are shown in Tables 1(a) and (b),  
187 respectively; those under the full and optimal NLRM are shown in Tables 2(a) and (b), respectively.

188 **Table 1. Estimated fixed effects parameters in the full NLMM (a) and those in the optimal**  
189 **NLMM (b).**

190 (a)

| Full NLMM  |          |       |                         |             |         |    |
|------------|----------|-------|-------------------------|-------------|---------|----|
| Parameter  | Estimate | SE    | 95% Confidence Interval |             | p-value |    |
|            |          |       | Lower bound             | Upper bound |         |    |
| $\beta_1$  | 0.069    | 0.015 | 0.041                   | 0.098       | 0.000   | ** |
| $\beta_2$  | -0.007   | 0.003 | -0.012                  | -0.001      | 0.023   | *  |
| $\omega_1$ | 10.391   | 4.808 | 0.968                   | 19.815      | 0.015   | *  |
| $\omega_2$ | 0.082    | 0.166 | -0.243                  | 0.407       | 0.310   |    |
| $\xi_0$    | 4.326    | 0.020 | 4.288                   | 4.364       | 0.000   | ** |
| $\xi_1$    | 0.003    | 0.041 | -0.076                  | 0.083       | 0.468   |    |
| $\xi_2$    | -0.008   | 0.022 | -0.052                  | 0.035       | 0.353   |    |

191

\*\* :  $p < 0.01$ , \* :  $0.01 \leq p < 0.05$

192

Estimated random effect parameters:  $(\psi^2, \phi^2, \sigma^2) = (0.0018, 0.0019, 0.0015)$

193

Log-likelihood: 643.47, AIC: -1266.94, BIC: -1227.44

194

195

196 (b)

| Optimal NLMM |          |       |                         |             |         |    |
|--------------|----------|-------|-------------------------|-------------|---------|----|
| Parameter    | Estimate | SE    | 95% Confidence Interval |             | p-value |    |
|              |          |       | Lower bound             | Upper bound |         |    |
| $\beta_1$    | 0.066    | 0.016 | 0.033                   | 0.098       | 0.000   | ** |
| $\beta_2$    | -0.006   | 0.003 | -0.012                  | 0.001       | 0.036   | *  |
| $\omega_1$   | 9.063    | 2.949 | 3.283                   | 14.843      | 0.001   | ** |
| $\xi_0$      | 4.319    | 0.014 | 4.290                   | 4.347       | 0.000   | ** |

197

\*\* :  $p < 0.01$ , \* :  $0.01 \leq p < 0.05$

198

Estimated random effect parameters:  $(\psi^2, \phi^2, \sigma^2) = (0.0018, 0.0019, 0.0015)$

199

Log-likelihood: 642.90, AIC: -1271.80, BIC: -1244.15

200

201 **Table 2. Estimated fixed effect parameters in the full NLRM (a) and those in the optimal**  
 202 **NLRM (b).**

203 (a)

12

| Full NLRM  |          |       |                         |             |         |    |
|------------|----------|-------|-------------------------|-------------|---------|----|
| Parameter  | Estimate | SE    | 95% Confidence Interval |             | p-value |    |
|            |          |       | Lower bound             | Upper bound |         |    |
| $\beta_1$  | 0.075    | 0.023 | 0.030                   | 0.120       | 0.001   | ** |
| $\beta_2$  | -0.006   | 0.005 | -0.016                  | 0.004       | 0.104   |    |
| $\omega_1$ | 3.922    | 1.404 | 1.170                   | 6.674       | 0.003   | ** |
| $\omega_2$ | 0.574    | 0.447 | -0.303                  | 1.450       | 0.100   |    |
| $\xi_0$    | 4.333    | 0.007 | 4.320                   | 4.346       | 0.000   | ** |
| $\xi_1$    | 0.003    | 0.016 | -0.028                  | 0.033       | 0.435   |    |
| $\xi_2$    | -0.011   | 0.008 | -0.027                  | 0.006       | 0.107   |    |

204

\*\* :  $p < 0.01$ , \* :  $0.01 \leq p < 0.05$

205

Estimated residual variance:  $\hat{\sigma}^2 = 0.00502$

206

Log-likelihood: 744.091, AIC: -928.17, BIC: -883.56

207

208

209

210

(b)

| Optimal NLRM |          |       |                         |             |         |    |
|--------------|----------|-------|-------------------------|-------------|---------|----|
| Parameter    | Estimate | SE    | 95% Confidence Interval |             | p-value |    |
|              |          |       | Lower bound             | Upper bound |         |    |
| $\beta_1$    | 0.049    | 0.005 | 0.039                   | 0.059       | 0.000   | ** |
| $\omega_1$   | 5.973    | 1.726 | 2.590                   | 9.356       | 0.000   | ** |
| $\xi_0$      | 4.334    | 0.006 | 4.323                   | 4.345       | 0.002   | ** |
| $\xi_2$      | -0.010   | 0.003 | -0.016                  | -0.004      | 0.000   | ** |

211

\*\* :  $p < 0.01$ , \* :  $0.01 \leq p < 0.05$

212

Estimated residual variance:  $\hat{\sigma}^2 = 0.0058$

213

Log-likelihood: 742.12, AIC: -930.25, BIC: -899.02

214

215

**3.1.2. Estimation of the random effects parameters.** In the optimal NLMM,

216

variances of the random effects due to individual differences, daily variation, and measurement

217 error were 0.0018, 0.0019, and 0.0015, which account for 35%, 36%, and 29% of the total variance,  
218 respectively. Predictions of individual differences  $(\hat{\delta}_1, \hat{\delta}_2, \dots, \hat{\delta}_{16})$  and those of daily fluctuation  
219  $(\hat{\eta}_{-3}, \hat{\eta}_{-2}, \dots, \hat{\eta}_{20})$  were obtained by calculating posterior means. The predictions  $\hat{\delta}_i$  in each of the  
220 four groups (control group and three irradiated groups) and the predictions  $\hat{\eta}_t$  by day are shown in  
221 panels (a) and (b) of Fig 3, respectively.

222

223 **Fig 3. Predictions of random values.** Predictions of random values by individual  $\hat{\delta}_i$  by group are  
224 shown in panel (a) and predictions of random values by day  $\hat{\eta}_t$  are shown in panel (b).

225

226 Residuals in the optimal NLMM and in the optimal NLRM are given by  $y_{it} - \hat{f}(t | D_i, \theta) - \hat{\delta}_i - \hat{\eta}_t$  and  
227  $y_{it} - \hat{f}(t | D_i, \theta)$ , respectively. The standard deviations of residual errors in the optimal NLMM  
228 and optimal NLRM were 0.038 and 0.071, respectively. The distributions of residuals in the NLMM  
229 and NLRM are shown in Fig 4.

230

231 **Fig 4. Parallel boxplots of residual errors in the non-linear mixed model (NLMM) and ordinary**  
232 **non-linear regression model (NLRM).**

233

234 **3.2. Comparison of goodness of fit of the NLMM and the NLRM**

235           There is a large difference between the AICs of the optimal NLMM and the optimal NLRM,  
236           which were  $-1271.80$  and  $-930.25$ , respectively (See Table 1 (b) and Table 2 (b)). The measurement  
237           error variances of the NLMM and NLRM were  $0.0015$  and  $0.0058$  (See Table 1 (b) and Table 2 (b)).  
238           Therefore the fit of the NLMM was preferable to that of the NLRM in terms of prediction and accuracy.  
239           The estimated time dependency of activity in each group under the optimal NLMM is shown in Fig 5.

240

241           **Fig 5. Estimated mean trends of daily locomotor activity in rats by dose group under the**  
242           **optimal NLMM..**

243

244           In each of the irradiated groups, activity decreased immediately after irradiation but recovered to the  
245           pre-irradiation level within a few days with a common recovery rate irrespective of dose.

## 246           **Discussion**

247           One of the advantages of using the more complex NLMM structure, as demonstrated in this  
248           paper, is that a second-order dose dependency could be detected in the initial decrease, which was  
249           not found with the NLRM (which estimated a linear dependency). Estimated magnitudes of initial  
250           decreases at  $t = 0$  by dose group and their 95% confidence intervals in the optimal NLMM and  
251           those in the optimal NLRM are shown in Fig 6.

252

253 **Fig 6. Fitted dose response curves from the optimal NLMM and the optimal NLRM.** The  
254 estimated magnitudes of decrease at  $t = 0$  by dose group and their 95% confidence intervals and  
255 fitted dose-response curves with dotted line from the NLMM and the NLRM are shown in panels (a)  
256 and (b), respectively. Cross marks show observed data of individual rats. The fitted dose-response  
257 curve from the optimal NLMM was a downward convex quadratic curve.

258

259 The plots of predictions of individual differences  $\hat{\delta}_i$  by dose group (Fig 3 (a)) show that the  
260 assumption of homoscedasticity for distributions of individual difference between the four dose  
261 groups seems to be satisfied. This means that the random assignment of rats to the four groups was  
262 effective in terms of individual differences. The plots of predictions of time-dependent daily  
263 fluctuation  $\hat{\eta}_t$  (Fig 3 (b)) show that the assumption of independency of each of the random variables  
264  $\eta_t$  seems to be satisfied. The Durbin Watson statistic [26] for  $\hat{\eta}_t$  was 2.33 (p-value 0.902),  
265 indicating that no strong autocorrelation is observed in daily fluctuation.

266 Because acute changes were the focus in this experiment, longer observation was not  
267 performed, but it is necessary to investigate late effects. The irradiation was a single and sub-lethal  
268 dose, so it is considered that damage was acute, disappearing in a short period of time, and  
269 resilience to allow recovery from the damage was not affected by irradiation. The effects of chronic  
270 low dose exposure remain as future issues to be addressed. As one important example of the need



271 for assessing effects of chronic exposure, a giant earthquake of magnitude M9 struck East Japan on  
272 March 11, 2011. Subsequently a ‘tsunami’ engulfed the Fukushima Daiichi Nuclear Power Plant  
273 (FDNPP). As a result, FDNPP reactors 1-3 suffered meltdown and significant amounts of radioactive  
274 materials have been released into the environment [27]. The dose to the public is estimated to be low  
275 [28], but many Japanese people are worried about the resulting health effects of chronic low dose  
276 exposure.

277 In the present study, effects of irradiation on behavior of rats were investigated efficiently,  
278 despite a small number of animals with large individual differences. This was achieved by using a  
279 statistical method that accounts for inter-animal differences and daily fluctuation in activity—a  
280 non-linear mixed model fit to repeated measurements. With such an efficient approach, we were able  
281 to demonstrate a temporary, but dose-dependent, decrease in activity following irradiation and a  
282 dose-independent common recovery rate. The statistical framework for analyzing longitudinal  
283 locomotor data in this study should be generally applicable to other repeated measurement data with  
284 similar structure.

## 285 **Supporting Information**

286 This work was supported by JSPS KAKENHI Grant Numbers 26257501 (April 2014–March  
287 2018) and 19H01149 (April 2019–March 2023).

## 288 Reference

- 289 1. Christensen DM, Parrillo SJ, Glassman ES, Goans RE. Management of Ionizing Radiation  
290 Injuries and Illnesses, Part 4: Acute Radiation Syndrome. The Journal of the American  
291 Osteopathic Association. 2014; 114 (9):702–11. doi: 10.7556/jaoa.2014.138 PMID: 25170040
- 292 2. Dörr H, Meineke V. Acute radiation syndrome caused by accidental radiation exposure –  
293 therapeutic principles. BMC Medicine. 2011; 9:126.  
294 <http://www.biomedcentral.com/1741-7015/9/126>
- 295 3. Dainiak N, Gent RN, Carr Z, Schneider R, Buglova E, Chao N, et al. Literature Review and  
296 Global Consensus on Management of Acute Radiation Syndrome Affecting  
297 Nonhematopoietic Organ Systems. Disaster Med Public Health Prep. 2011; 5(3): 183–201.  
298 doi:10.1001/dmp.2011.73.
- 299 4. Donnelly EH, Nemhauser JB, Smith M, Kazzi ZN, Farfán EB, Chang AS, Naeem SF. Acute  
300 Radiation Syndrome: Assessment and Management. South Med J. 2010; 103(6):541–6.  
301 doi:10.1097/SMJ.0b013e3181ddd571 PMID: 20710137
- 302 5. López M, Martín M. (2011) Medical management of the acute radiation syndrome. Reports of  
303 practical oncology and radiotherapy. 2011; 16:138–146. doi: 10.1016/j.rpor.2011.05.001 PMID:  
304 24376971

- 305 6. Hofman M, Ryan JL, Figueroa–Moseley CD, Jean–Pierre P, Morrowa GR. Cancer–Related  
306 Fatigue: The Scale of the Problem. *Oncologist*. 2007; 12 (Suppl 1):4–10. doi:  
307 10.1634/theoncologist.12–S1–4 PMID: 17573451
- 308 7. Jereczek–Fossa BA, Santoro L, Alterio D, Franchi B, Fiore MR, Fossati P, Kowalczyk A, Canino  
309 P, Ansarin M, Orecchia R. Fatigue during head–and–neck radiotherapy: prospective study on  
310 117 consecutive patients. *Int. J. Radiation Oncology Biol. Phys.* 2007; 68(2): 403–415. DOI:  
311 10.1016/j.ijrobp.2007.01.024 PMID: 17398020
- 312 8. Bower JE, Ganz PA, Tao ML, Hu W, Belin TR, Sepah S, Cole S, Aziz N. Inflammatory  
313 Biomarkers and Fatigue during Radiation Therapy for Breast and Prostate Cancer. *Clin Cancer*  
314 *Res.* 2009; 15(17): 5534–5540. doi:10.1158/1078–0432.CCR–08–2584
- 315 9. Hsiaoa CP, Dalya B, Saliganba NL. The Etiology and management of radiotherapy–induced  
316 fatigue. *Expert Rev Qual Life Cancer Care.* 2016 ; 1(4): 323–328.  
317 doi:10.1080/23809000.2016.1191948
- 318 10. Albuquerque K, Tell D, Lobo P, Millbrandt L, Mathews HL, Witek, Janusek LW. Impact of partial  
319 versus whole breast radiation therapy on fatigue, perceived stress, quality of life and natural  
320 killer cell activity in women with breast cancer. *BMC Cancer.* 2012;  
321 12:251. <http://www.biomedcentral.com/1471–2407/12/251>

- 322 11. Maier DM, Landauer MR. Effects of acute sublethal gamma radiation exposure on aggressive  
323 behavior in male mice: a dose–response study. *Aviat Space Environ Med.* 1989; 60(8):774–8.  
324 PMID: 2775134
- 325 12. Landauer MR, Davis HD, Dominitz JA, Weiss JF. Long–term effects of radioprotector WR–2721  
326 on locomotor activity and body weight of mice following exposure to ionizing radiation. *Toxicology.*  
327 1988; 49(2–3):315–23. doi: 10.1016/0300–483x(88)90014–5 PMID: 2836973
- 328 13. Jones DC, Kimeldorf DJ, Rubadeau DO, Osborn GK, Castanera TJ. Effect of x–irradiation on  
329 performance of volitional activity by the adult male rat. *Am J Physiol.* 1954; 177(2):243–50. doi:  
330 10.1152/ajplegacy.1954.177.2.243 PMID: 13158555
- 331 14. Landauer MR (2002) Radiation–Induced Performance Decrement. *Military Medicine.* 2002; 167(  
332 2 Suppl): 128–30. doi: 10.1093/milmed/167.suppl\_1.128
- 333 15. York JM, Blevins NA, Meling DD, Peterlin MB, Gridley DS, Cengel KA, Freund GG. The  
334 biobehavioral and neuroimmune impact of low–dose ionizing radiation. *Brain Behav Immun.*  
335 2012; 26(2): 218–227. doi:10.1016/j.bbi.2011.09.006.
- 336 16. Davidian M. and Giltinan DM. *Nonlinear Models for Repeated Measurement Data: An Overview*  
337 *and Update.* JABES. 2003; 8: 387–419. doi:10.1198/1085711032697
- 338 17. Pinheiro JC, Bates DM. *Mixed-effects Models in S and S-PLUS.* New York: Springer; 2000.

- 339 18. Tsuchihashi S, Enamoto Y, Yamada T, Nakamura W, Eto H. The Mortality and Body Weight  
340 Response of Male Wister Rats in the Lethal X-ray Dose Range. J Radiat Res. 1969;  
341 10(3)4:133–138. PMID: 5382979 doi: 10.1269/jrr.10.133
- 342 19. Sidlo J, Zaviacic M, Kvasnicka P. Night and day differences in the food-intake of laboratory rats  
343 Wistar and Koletsky strains. Bratisl Lek Listy.1995; 96(12):655–7. PMID: 8624748
- 344 20. Byrd RH, Lu P, Nocedal J, Zhu C. A limited memory algorithm for bound constrained  
345 Optimization. SIAM Journal on Scientific Computing. 1995; 16(5): 1190–1208. doi:  
346 10.1137/0916069
- 347 21. Akaike H. Information theory and an extension of the maximum likelihood principle. Proceedings  
348 of the 2nd International Symposium on Information Theory, Petrov, B. N., and Caski, F. (eds.),  
349 Akadimiai Kiado, Budapest. 1973; 267–281
- 350 22. Schwarz GE. Estimating the dimension of a model. Annals of Statistics, 1978; 6 (2): 461–  
351 464. doi:10.1214/aos/1176344136. MR468014.
- 352 23. Konishi S, Kitagawa G. Information Criteria and Statistical Modeling. Springer; 2008.
- 353 24. Harville DA. Maximum likelihood approaches to variance component estimation and to related  
354 problems. Journal of the American Statistical Association. 1977; 72: 320–340.
- 355 25. Bates D, Mächler M, Bolker BM, Walker SC. Fitting Linear Mixed-Effects Models Using lme4.  
356 Journal of Statistical Soft-ware. 2015; doi: 10.18637/jss.v067.i01

- 357 26. Durbin J, Watson GS. Testing for Serial Correlation in Least Squares Regression I. *Biometrika*.  
358 1950; **37**, 409--428. doi: 10.2307/2332391
- 359 27. Strickland E. Explainer: What went wrong in Japan's nuclear reactors. *IEEE Spectrum* 4. 2011:  
360 [https://spectrum.ieee.org/tech-talk/energy/nuclear/explainer-what-went-wrong-in-japans-nucl](https://spectrum.ieee.org/tech-talk/energy/nuclear/explainer-what-went-wrong-in-japans-nuclear-reactors)  
361 [ear-reactors](https://spectrum.ieee.org/tech-talk/energy/nuclear/explainer-what-went-wrong-in-japans-nuclear-reactors)
- 362 28. United Nations Scientific Committee on the Effects of Atomic Radiation (UNSCEAR) (2014).  
363 UNSCEAR 2013 Report to the General Assembly with scientific annexes, Annex B: Effects of  
364 radiation exposure of children. New York: UNSCEAR.
- 365

bioRxiv preprint doi: <https://doi.org/10.1101/858985>; this version posted November 29, 2019. The copyright holder for this preprint (which was not certified by peer review) is the author/funder, who has granted bioRxiv a license to display the preprint in perpetuity. It is made available under aCC-BY 4.0 International license.

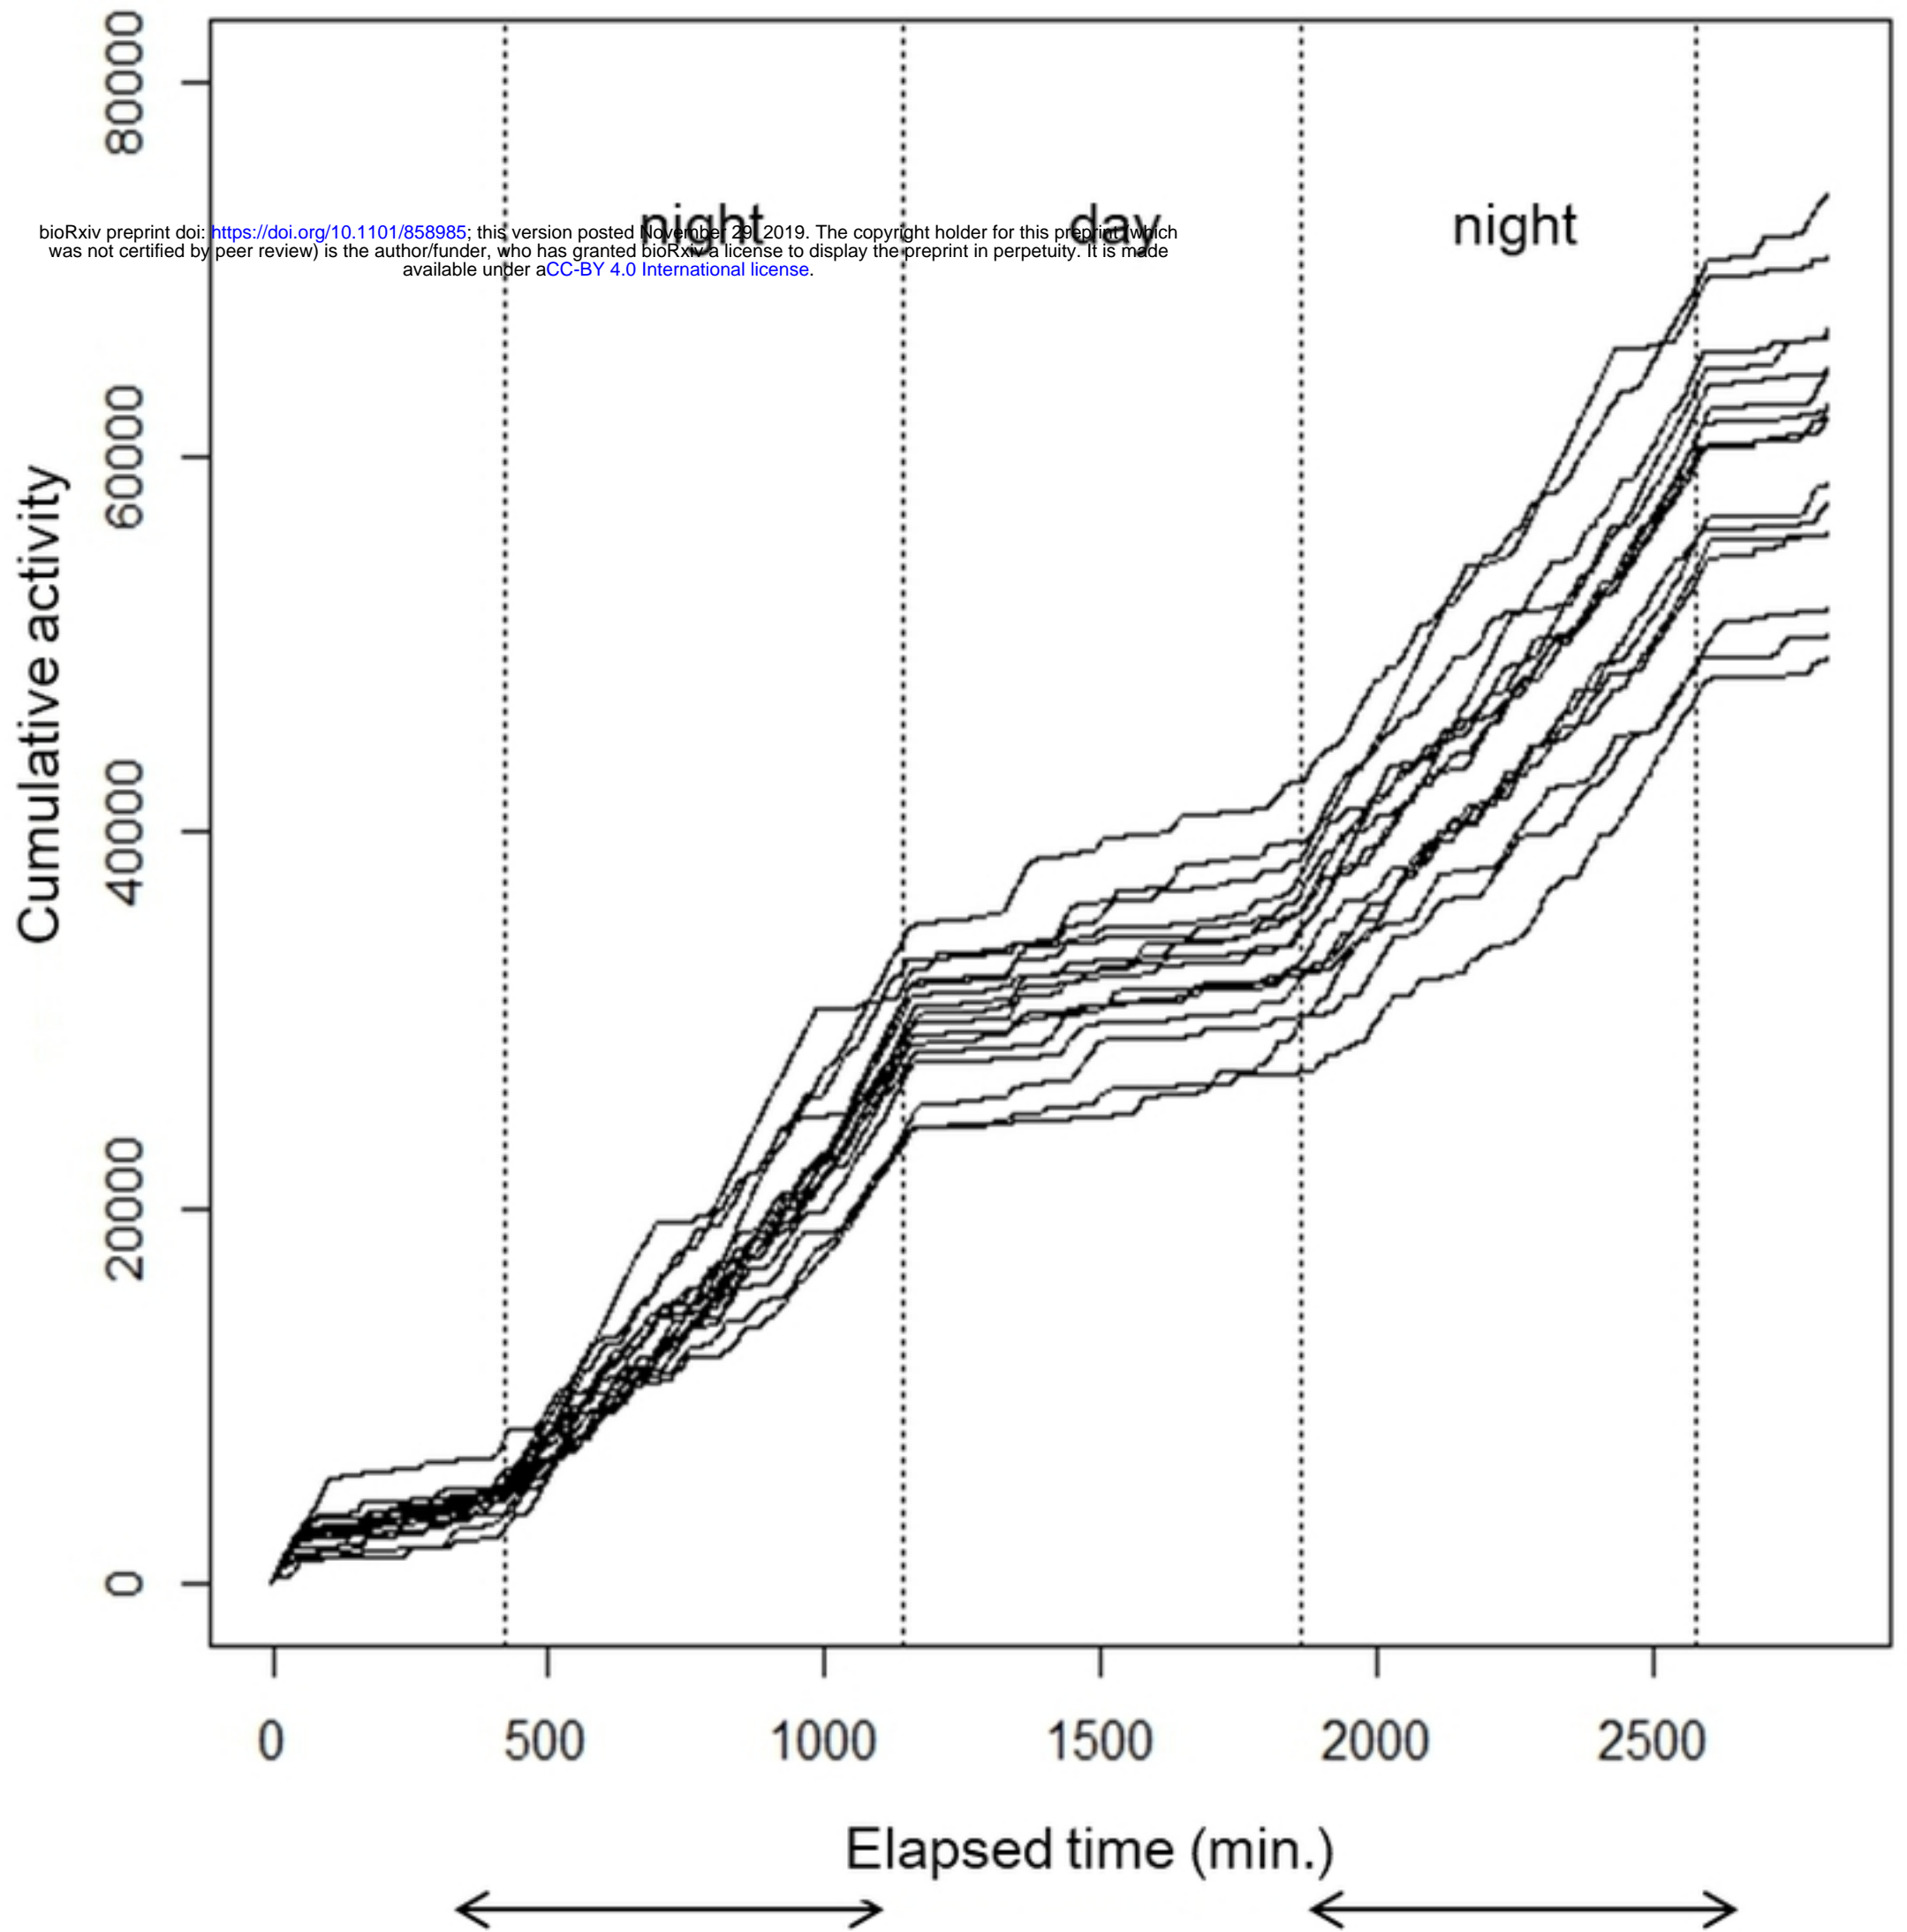

Figure

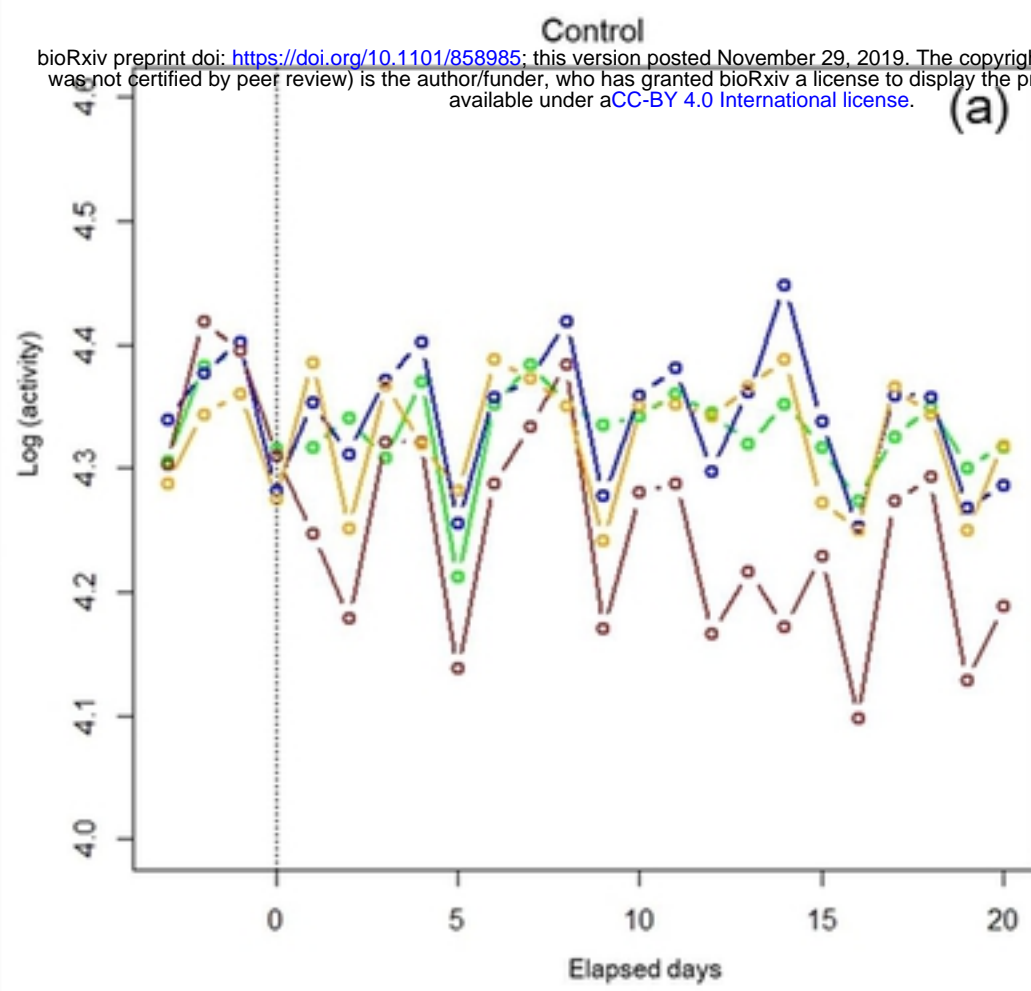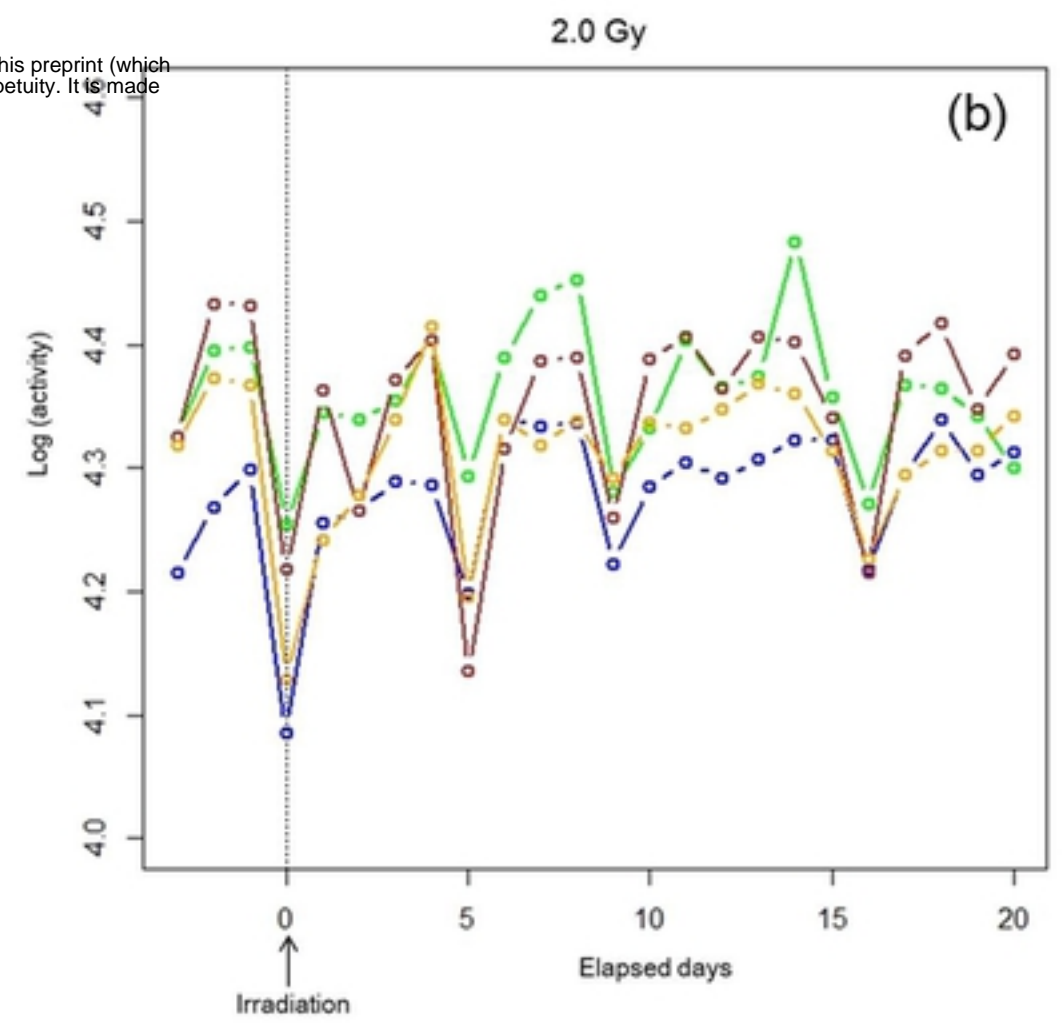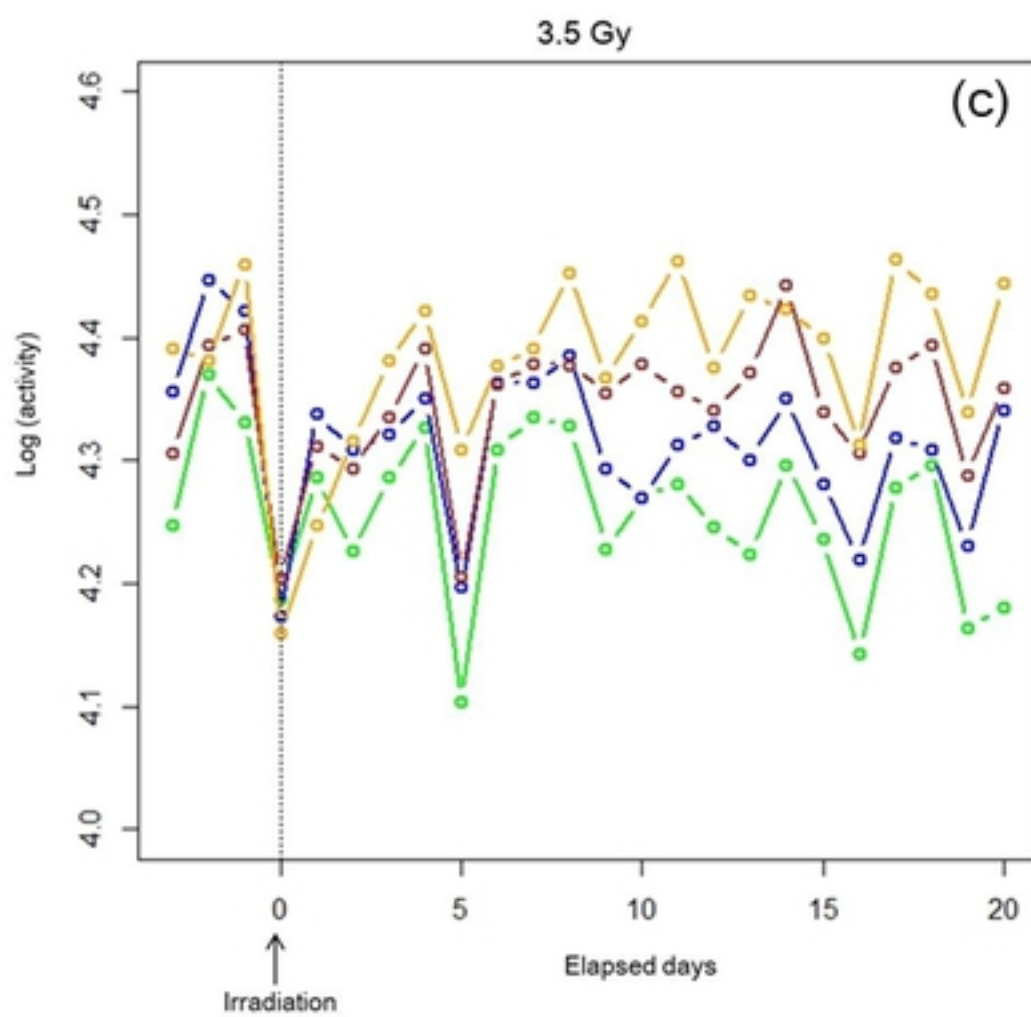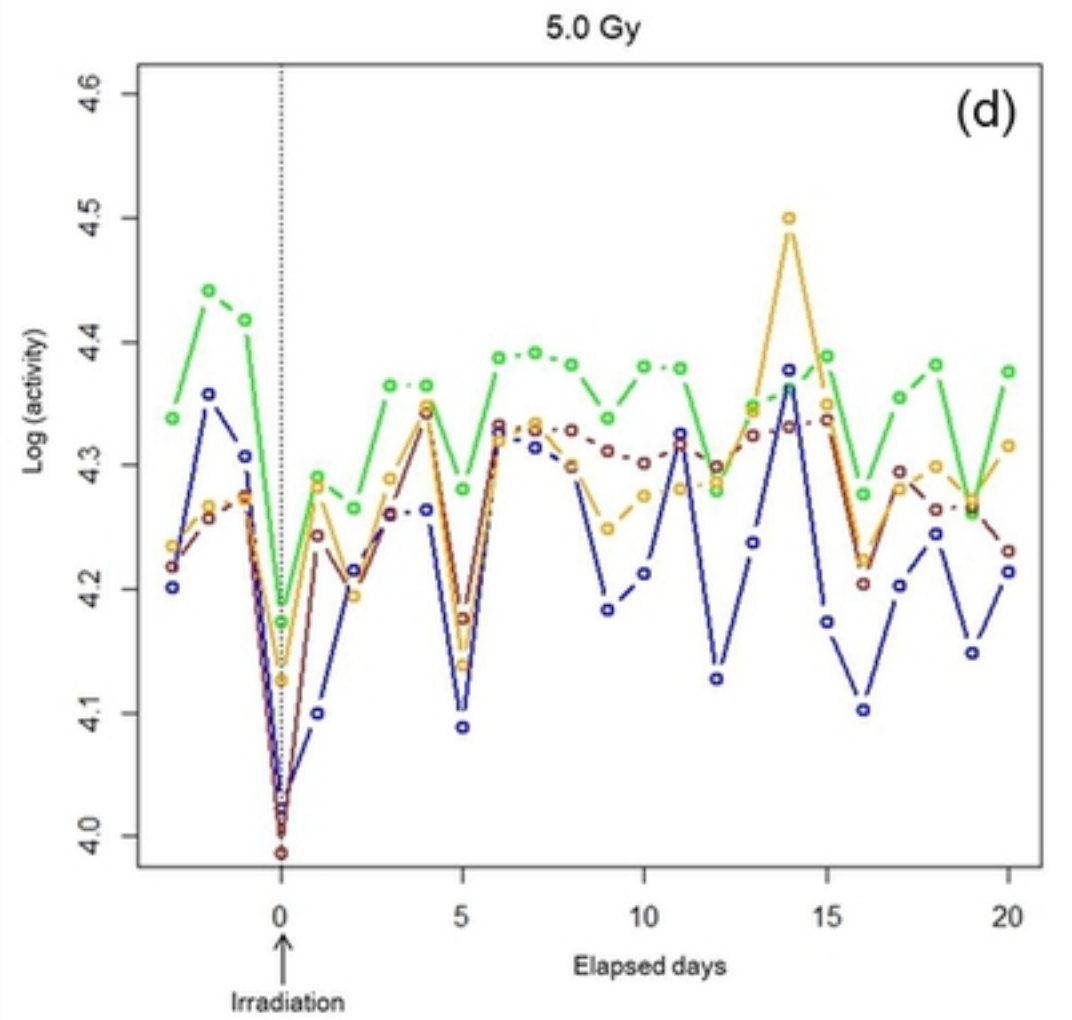

Figure



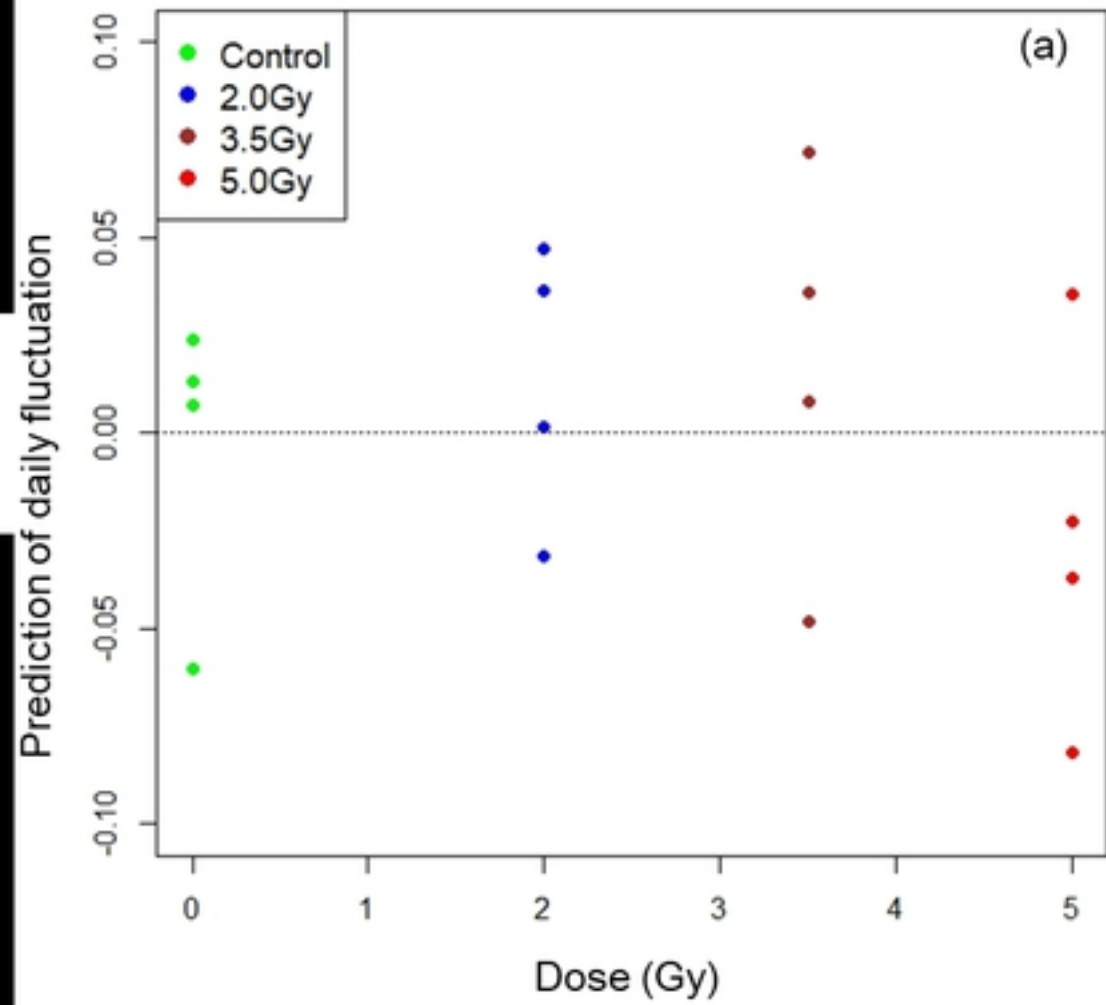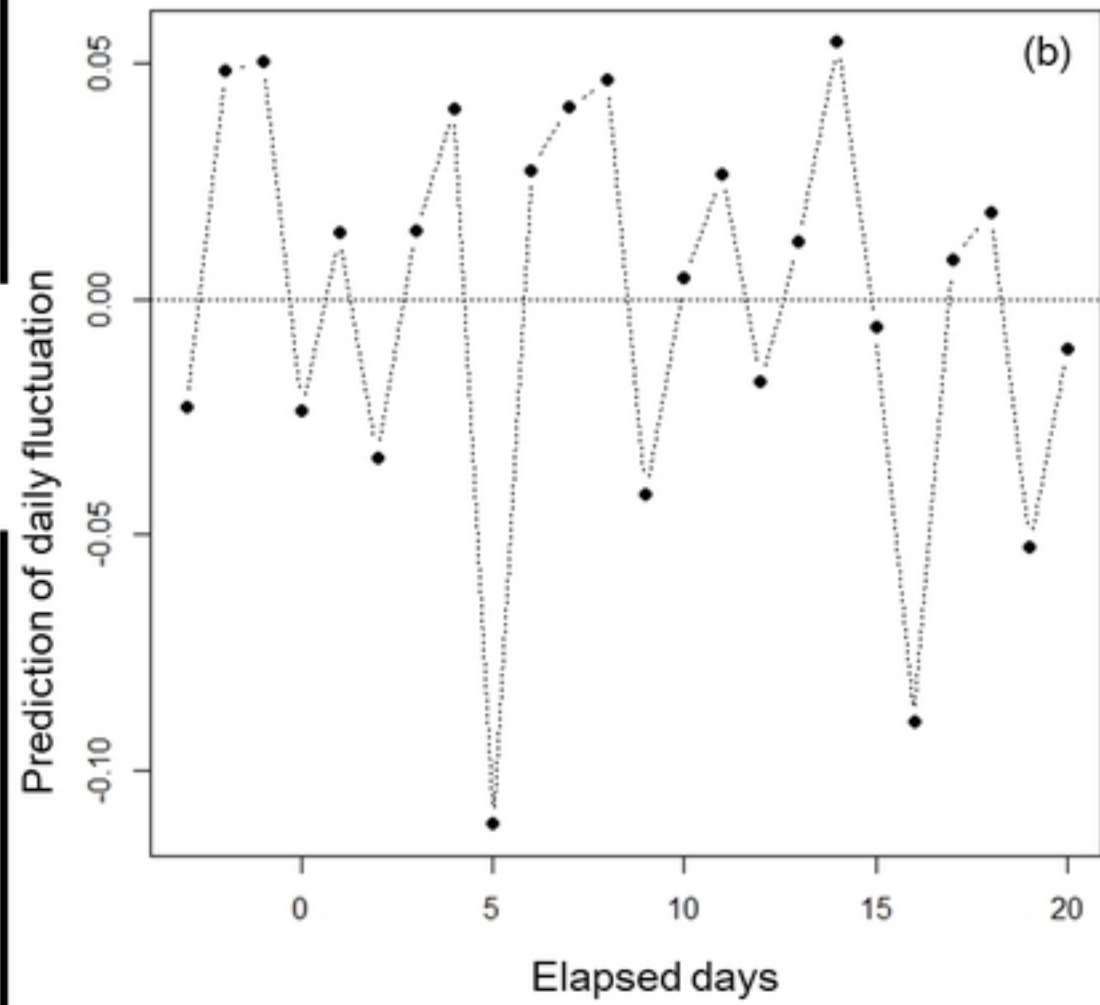

Figure

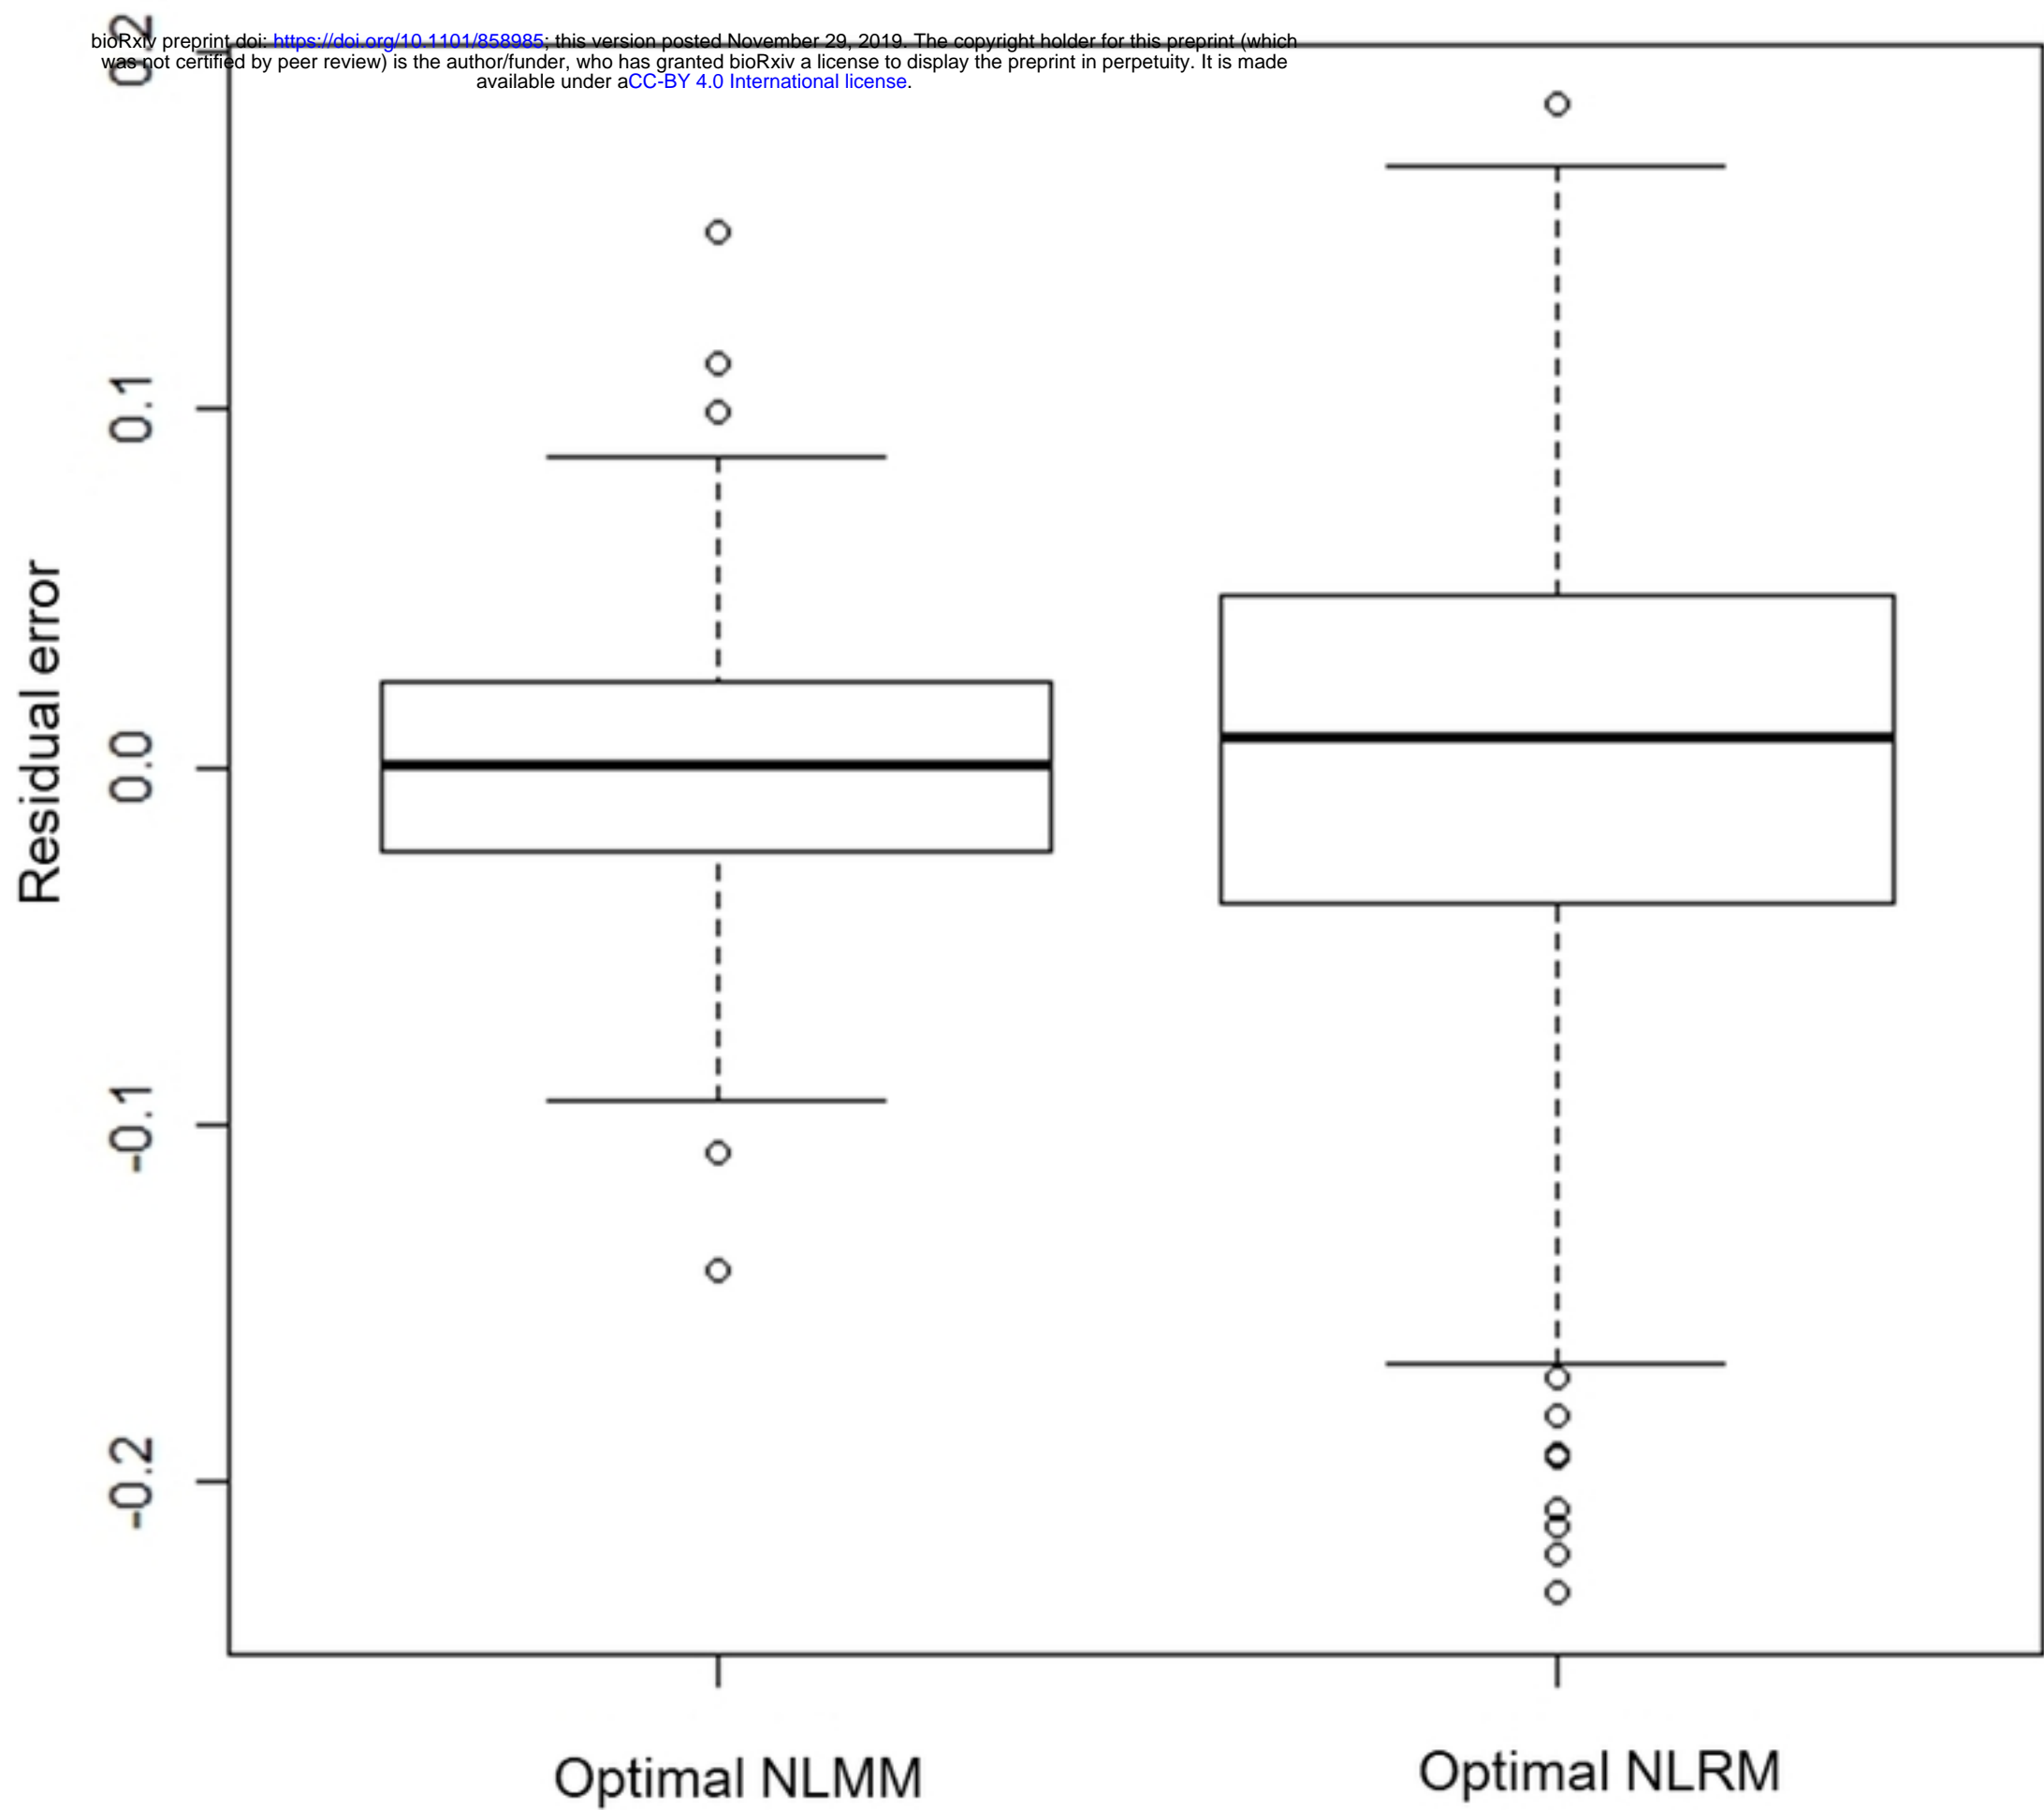

Figure

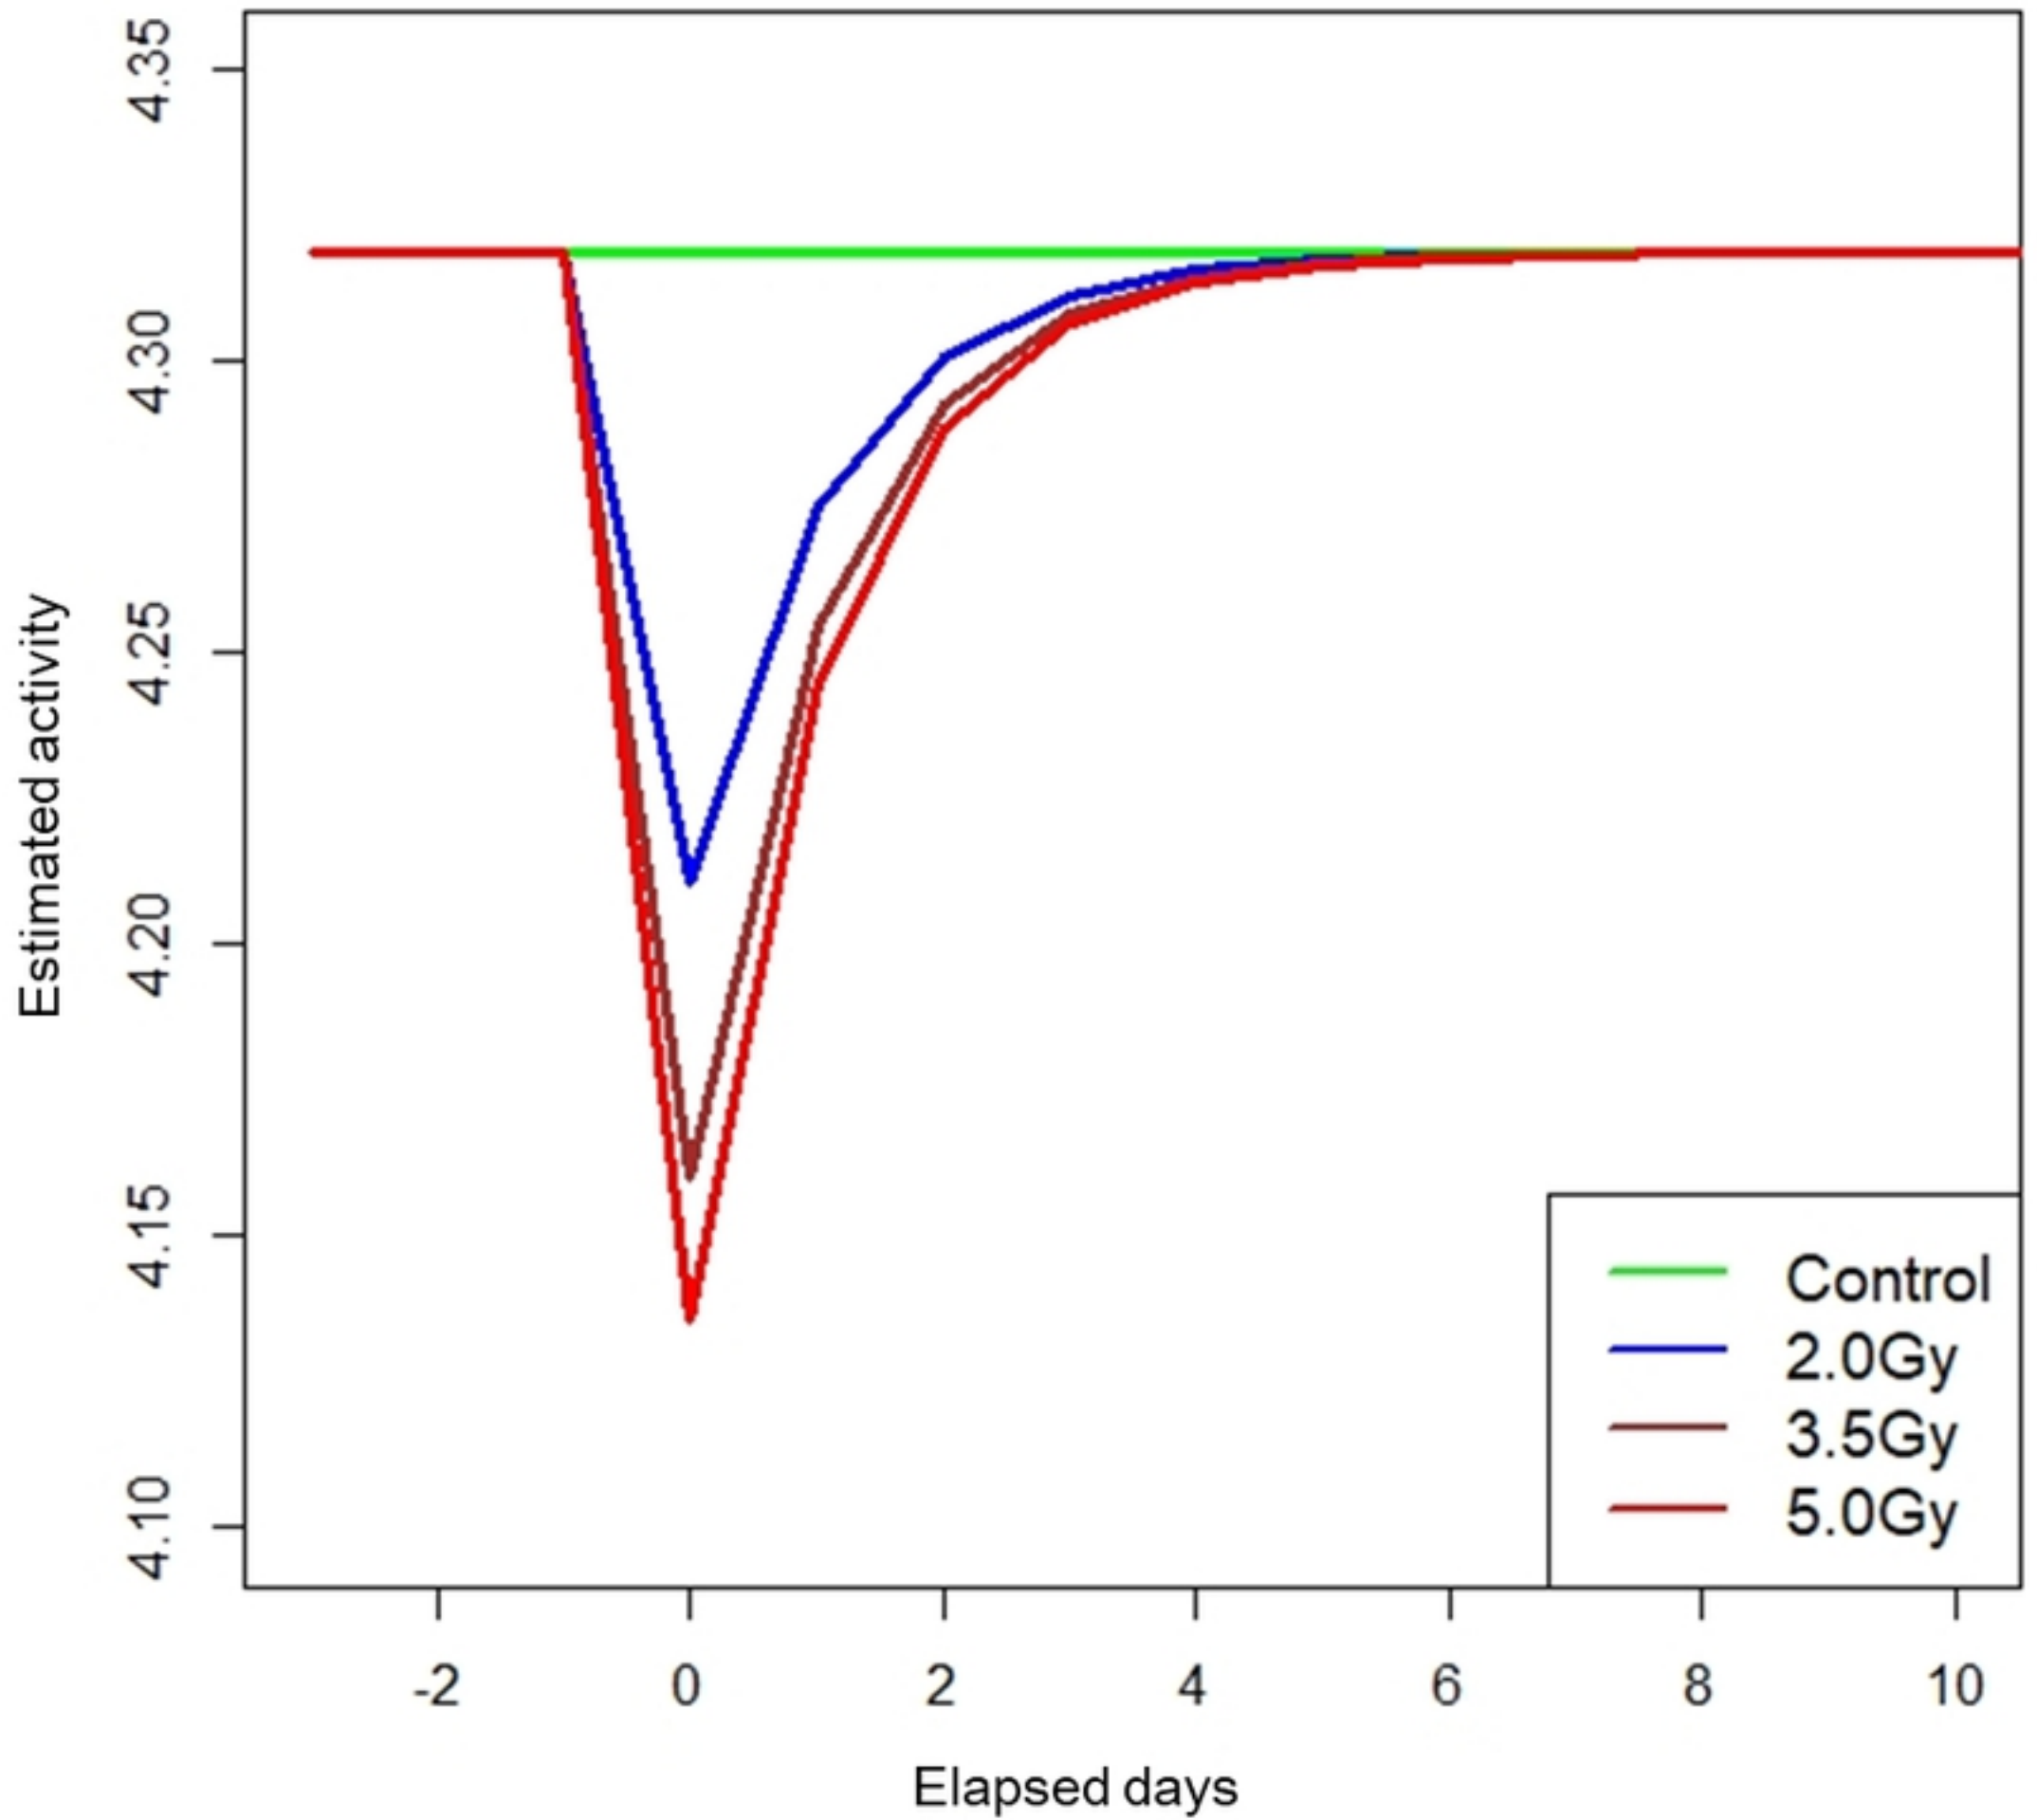

Figure

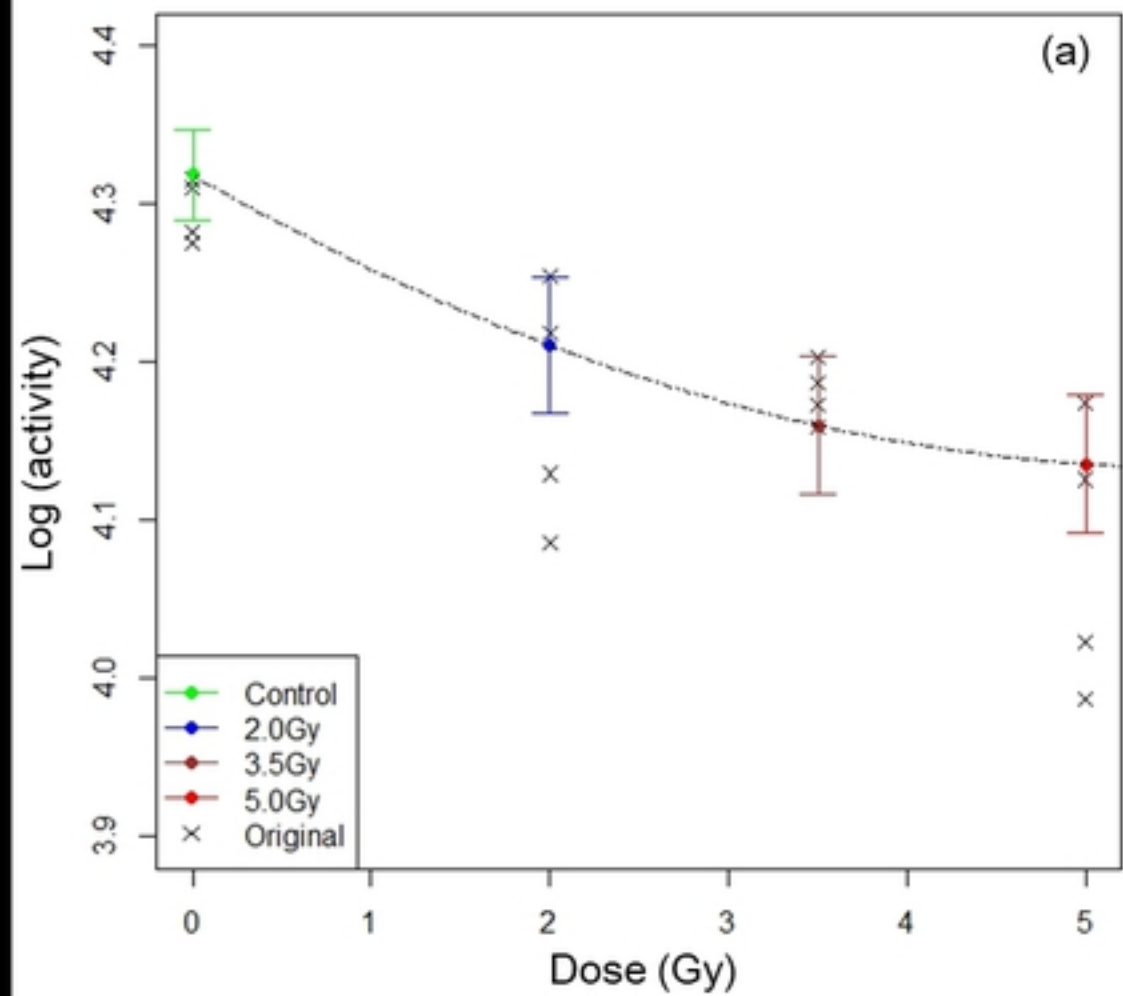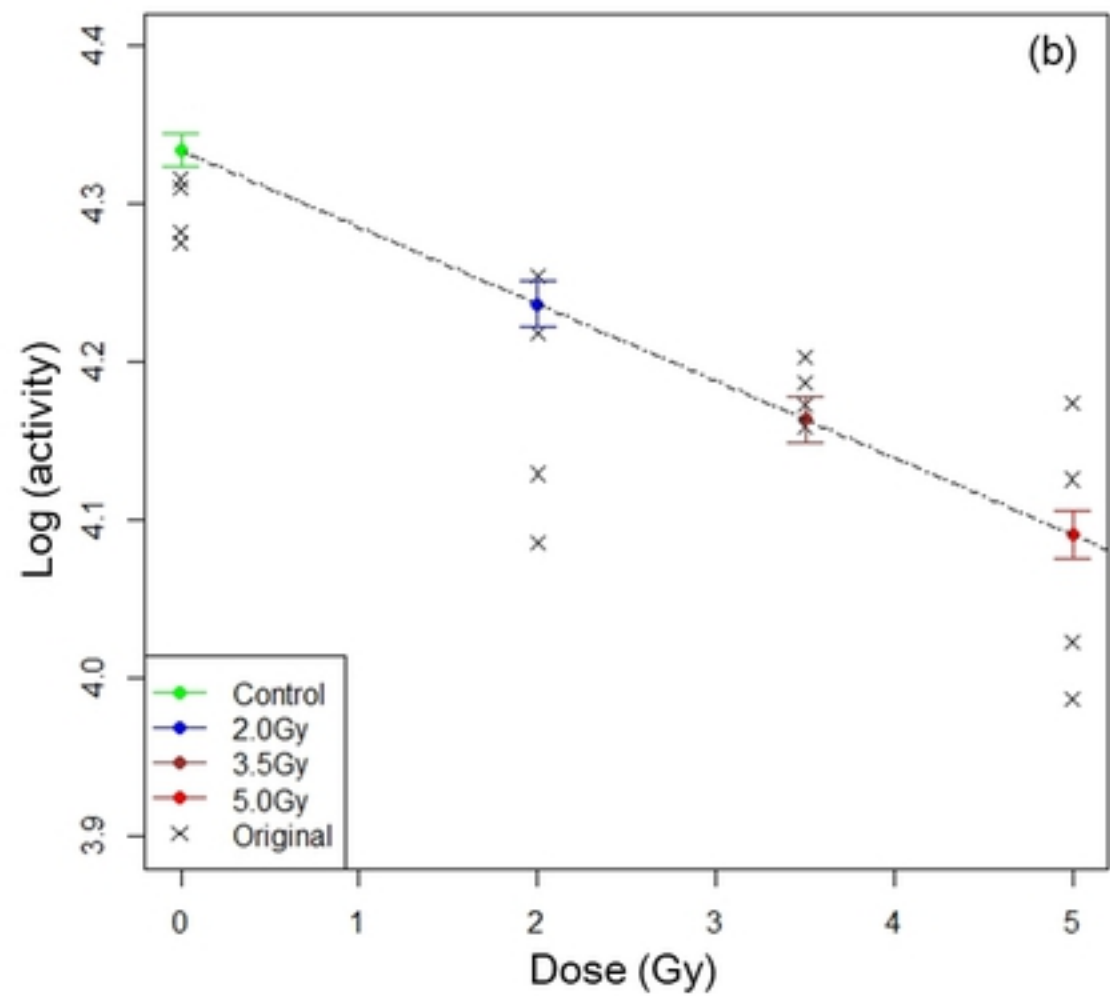

Figure
